# Supplementary material
Source: PubMed Central journal article supplement (PMC4389621)
Supplement: rspb20150060supp1.pdf [file rspb20150060supp1.pdf]

## Supplementary Information

**Alternative metrics of taxonomic richness:** In analyses presented in the main text, we describe taxonomic richness using range-through (RT) richness, for which taxa are presumed to persist between their intervals of first and last occurrence. For completeness, we also estimated the pattern of taxonomic richness using two other common metrics of richness. The first is sampled-in-bin richness (SIB), which counts only taxa (i.e., families) actually preserved within an interval, regardless of whether they were preserved in earlier or later intervals. The second alternative richness metric we use is the three-timer (3T) correction (figures S1*c,e* and S2*c,e*). For 3T, SIB richness within an interval is adjusted by dividing by the sampling probability in that interval, which is calculated as the proportion of taxa preserved in the immediately earlier and immediately later interval that are preserved within the focal interval.

For these alternative metrics, the number of taxa sampled within in an interval either entirely (SIB) or predominantly (3T) determines the apparent pattern of taxonomic richness. Sampling of the coleopteran fossil record varies greatly among intervals (see text figures 1*a* and *c*), and so has a variable impact on the inferred patterns of richness using these metrics. Our use of RT moderates the interval-to-interval variation to an extent, so we think it provides the most accurate representation of the pattern of coleopteran family richness.

**Figure S1.** Patterns of beetle family richness using alternative richness metrics not using extant occurrences. Family richness of all Coleoptera within 25My intervals using A) range-through, B) sampled-in-bin, and C) three-timer richness metrics. Unstandardized (black dashed line) and sample-standardized family richness curves (solid green line) are shown. Green-shaded envelope surrounding sample-standardized richness indicates 95% confidence intervals based on pseudoreplicate subsampling (see Methods). Unstandardized (dashed lines) and sample-standardized (solid lines) family richness within the suborder Polyphaga (purple) and non-polyphagan suborders (orange) within 25My intervals using D) range-through, E) sampled-in-bin, and F) three-timer richness metrics.

**(a)** Range-Through Richness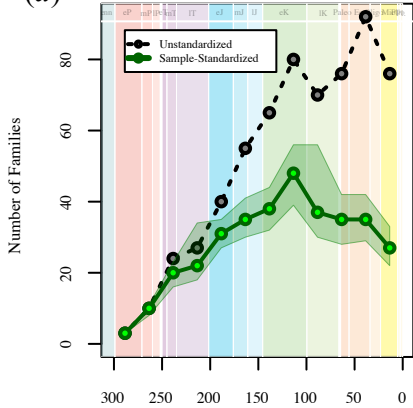**(b)** Sampled-in-Bin Richness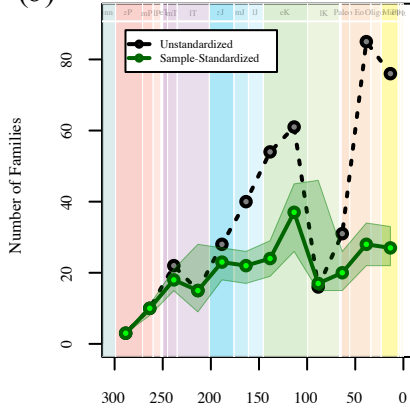**(c)** Three-Timer Richness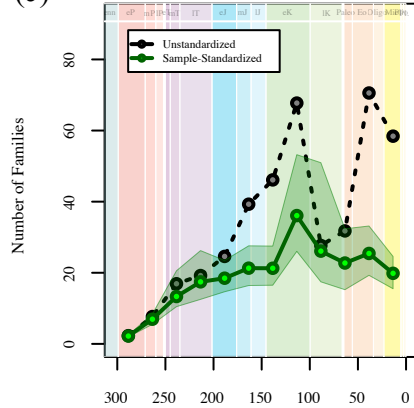**(d)** Polyphaga vs non-Polyphaga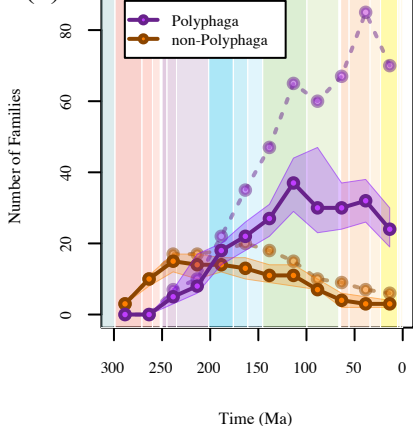**(e)** Polyphaga vs non-Polyphaga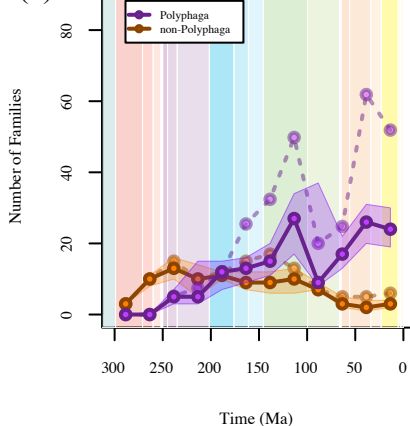**(f)** Polyphaga vs non-Polyphaga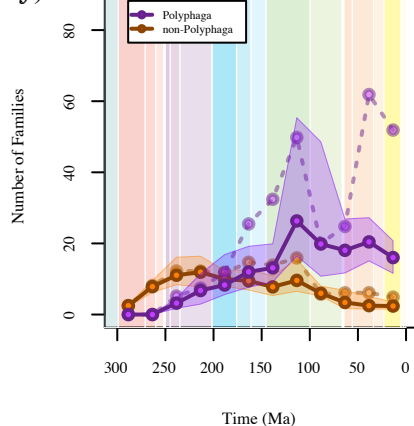

**Figure S2.** Patterns of beetle family richness using alternative richness metrics. These analyses included extant occurrences, and used rarefaction in sample-standardization procedures. All metrics, symbols and colors as in figure S1.

**(a)** Range-Through Richness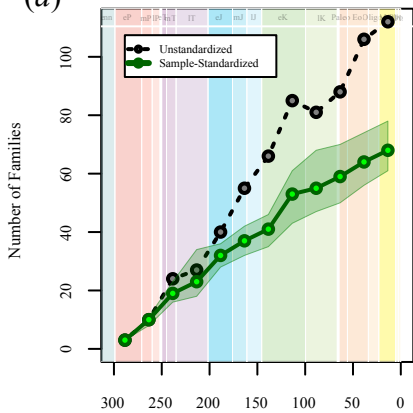**(b)** Sampled-in-Bin Richness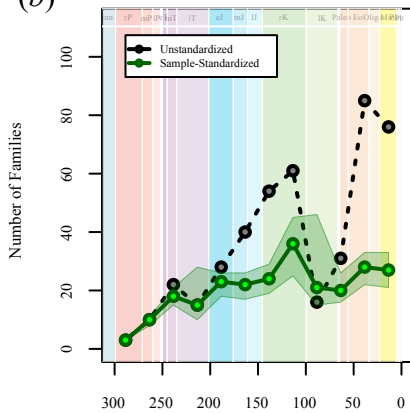**(c)** Three-Timer Richness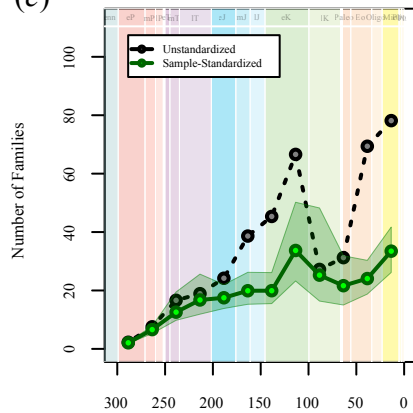**(d)** Range-Through Richness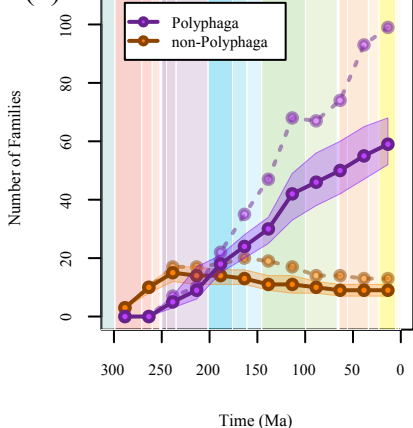**(e)** Sampled-in-Bin Richness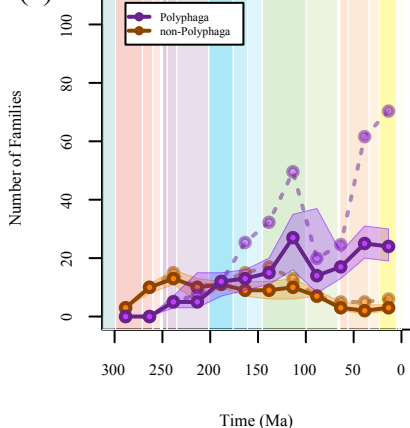**(f)** Three-Timer Richness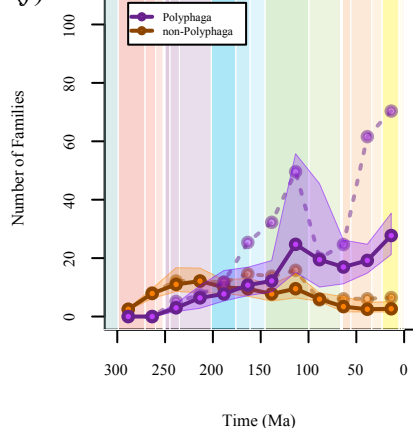

**Pull of the Recent:** In analyses presented in the main text, we treated extant taxa as having an “occurrence” in the Recent. This practice artificially extends the ranges of 36 extant families that are preserved in the fossil record, but did not have an occurrence in our final interval. Because we used first and last occurrences to generate stratigraphic ranges to estimate richness and taxonomic rates, this practice can influence the results of our analyses. To determine the effect of the Pull of the Recent on our results, we also estimated taxonomic richness using all three richness metrics (i.e., RT, SIB, 3T) without extending the ranges of these extant taxa (figure S1).

The early part of the RT richness curve for all coleopteran families (figure S1*a*) is identical, showing richness increasing at nearly constant rate. A more rapid increase in richness also is apparent in both curves during the latter part of the Early Cretaceous. The two curves predictably diverge after the Early Cretaceous, particularly in the final interval. Sampling in the final interval in our time-series is moderate in comparison with other intervals, but relatively poor in comparison with the preceding interval, which imparts an apparent decline in family richness in the final interval. It should be noted, however, that this apparent extinction is largely an artifactual “edge effect” (e.g., ref 4) due to our “window of observation” and incomplete sampling in our final fossil interval. Specifically, our study interval (i.e., the “window of observation”) continues to the Recent, so there is no later interval in which taxa could be preserved as fossils, and accordingly had their ranges extended beyond our final fossil interval. Our use of extant “occurrences” ameliorates this bias due to edge effects.

Note that because SIB richness is not influenced by the Pull of the Recent, so figures S2*b* and S2*e* are identical to S2*b* and S2*e*, respectively. Similarly, the Pull of the Recent only influences the final interval for 3T richness, so figures S3*c* and S3*f* differ only slightly from Figures S1*b* and S1*f*, respectively.

**Alternative sample-standardization procedures:** In analyses presented in the main text, we sought to minimize interval-to-interval variation in sampling using rarefaction of occurrences. We also applied shareholder quorum subsampling (SQS; 3), which has some clear theoretical advantages over simple

rarefaction. However, we are cautious about the application of SQS to our dataset for theoretical (with respect to our dataset) and empirical reasons. Specifically, in SQS, collections within intervals are drawn until a particular “coverage” level is reached. A taxon’s contribution to the coverage quota is the proportion of occurrences in the interval that belong to it. Essentially, this proportion is a measure of the taxon’s “commonness” among localities in the interval. However, the vast majority of published records of insect species are original descriptions, and subsequent finds of the same species rarely find their way into print. Therefore, a beetle species that is a relatively common fossil and one that is extraordinarily rare would both likely appear as single occurrences, thus diminishing the correspondence between the true “commonness” of species and their representation as published occurrences. The use of SQS under these conditions might serve to distort evolutionary patterns, rather than reveal them. In practice, the macroevolutionary patterns found using SQS do not differ qualitatively from those using rarefaction by occurrences (figure S3), although SQS generally results in larger confidence intervals for our data set.

**Figure S3.** Patterns of beetle family richness using shareholder quorum subsampling (SQS) and extant occurrences. All metrics, symbols and colors as in figure S1.

**(a)** Range-Through Richness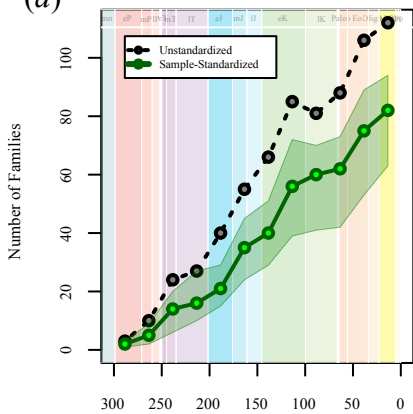**(b)** Sampled-in-Bin Richness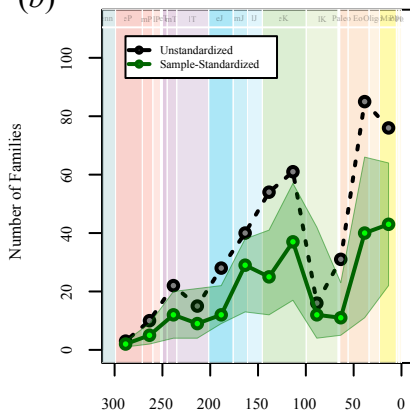**(c)** Three-Timer Richness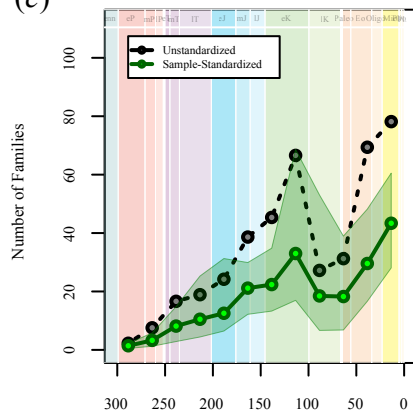**(d)** Range-Through Richness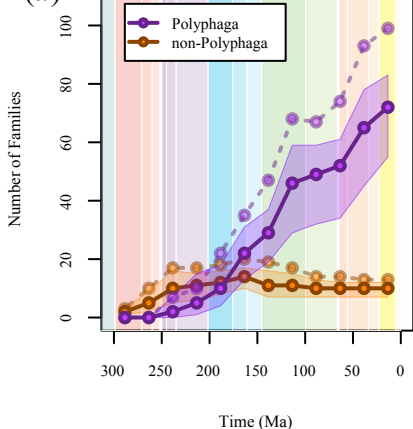**(e)** Sampled-in-Bin Richness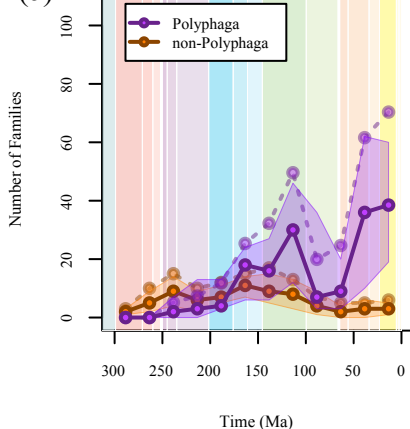**(f)** Three-Timer Richness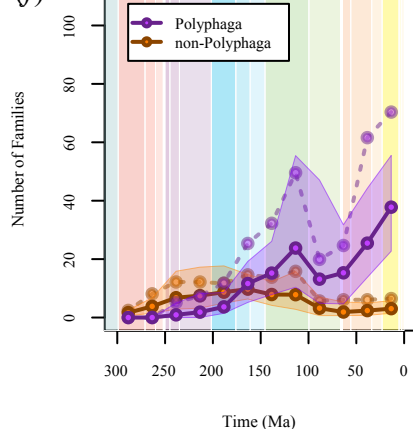

**Figure S4.** Per-capita rates of beetle family diversification with all specimens preserved in amber removed from the analysis. This figure can be compared to figure 4 in the main document. A) Rate of net diversification for all beetle families within 25My intervals. Solid green line shows median rate from 1000 pseudoreplicate analyses, and surrounding green envelope indicates 95% confidence intervals. B) Rate of net diversification for Polyphaga (purple) and non-polyphagan suborders (orange) within 25My intervals. C) Per-capita rate of family origination for Polyphaga (purple) and non-polyphagan suborders (orange) within 25My intervals. Note that there is no longer a peak in origination rates in the early Cretaceous. D) Per-capita rate of family extinction for Polyphaga (purple) and non-polyphagan suborders (orange) within 25My intervals. Again, there are no known extinct families within Polyphaga, so their extinction rate is 0.0 throughout.



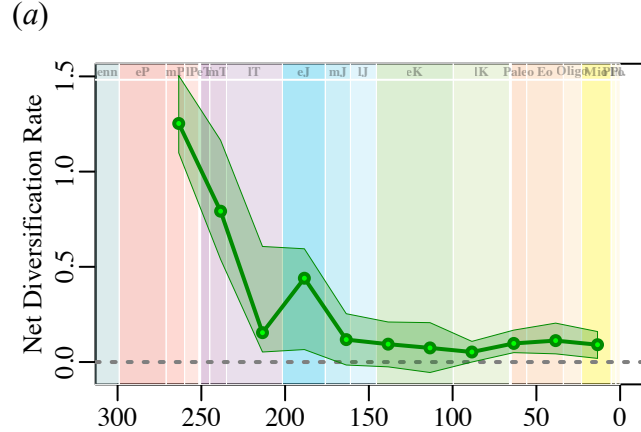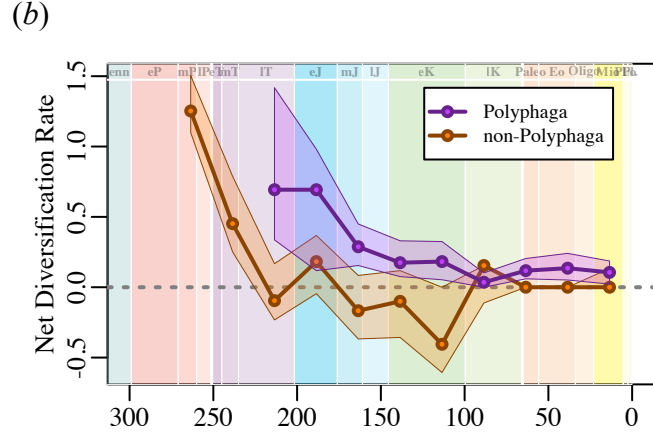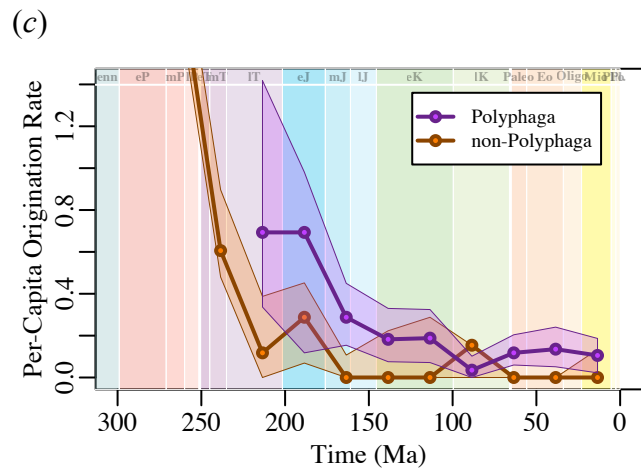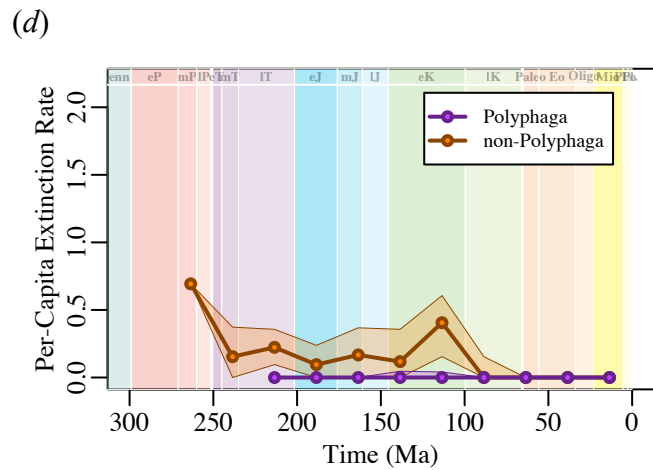

**Table S1.** Maximum and minimum age estimates of first and last occurrences (dates in millions of years ago) for beetle families. Citations document first occurrences of taxa.

| <b>Suborder</b> | <b>Family</b>      | <b>First Occurrence (max)</b> | <b>First Occurrence (min)</b> | <b>Last Occurrence (max)</b> | <b>Last Occurrence (min)</b> | <b>Citation(s)</b> |
|-----------------|--------------------|-------------------------------|-------------------------------|------------------------------|------------------------------|--------------------|
| Adephaga        | Carabidae          | 201.5                         | 196.5                         | 0 (extant)                   | 0 (extant)                   | (5)                |
| Adephaga        | Colymbotethidae    | 230                           | 203.6                         | 230                          | 203.6                        | (6)                |
| Adephaga        | Coptoclauidae      | 236                           | 201.5                         | 125                          | 112                          | (7, 8)             |
| Adephaga        | Dytiscidae         | 201.5                         | 196.5                         | 0 (extant)                   | 0 (extant)                   | (9, 10)            |
| Adephaga        | DytiscoidFam1      | 252.3                         | 247.2                         | 252.3                        | 247.2                        | (11)               |
| Adephaga        | Gyrinidae          | 203.6                         | 176                           | 0 (extant)                   | 0 (extant)                   | (12)               |
| Adephaga        | Haliplidae         | 130                           | 125                           | 0 (extant)                   | 0 (extant)                   | (13)               |
| Adephaga        | Hygrobiidae        | 28.4                          | 23                            | 0 (extant)                   | 0 (extant)                   | (14)               |
| Adephaga        | Liadytidae         | 183                           | 175.6                         | 125                          | 99.6                         | (15, 16)           |
| Adephaga        | Parahygrobiidae    | 161.2                         | 155.7                         | 161.2                        | 155.7                        | (5)                |
| Adephaga        | Trachypachidae     | 259                           | 252.3                         | 0 (extant)                   | 0 (extant)                   | (17)               |
| Adephaga        | Triaplidae         | 236                           | 230                           | 136.4                        | 130                          | (5, 18)            |
| Adephaga        | Tritarsidae        | 55.8                          | 48.6                          | 55.8                         | 48.6                         | (19)               |
| Archostemata    | Ademosynidae       | 272.5                         | 268                           | 130                          | 125                          | (20, 21)           |
| Archostemata    | Catiniidae         | 236                           | 230                           | 125                          | 112                          | (22, 23)           |
| Archostemata    | Cupedidae          | 272.5                         | 268                           | 0 (extant)                   | 0 (extant)                   | (24)               |
| Archostemata    | Jurodidae          | 161.2                         | 155.7                         | 0 (extant)                   | 0 (extant)                   | (15)               |
| Archostemata    | Magnocoleidae      | 236                           | 201.5                         | 236                          | 201.5                        | (25)               |
| Archostemata    | Micromalthidae     | 125                           | 112                           | 0 (extant)                   | 0 (extant)                   | (26)               |
| Archostemata    | Obrieniidae        | 236                           | 230                           | 161.2                        | 155.7                        | (27)               |
| Archostemata    | Ommatidae          | 236                           | 230                           | 0 (extant)                   | 0 (extant)                   | (23)               |
| Archostemata    | Schizophoridae     | 236                           | 230                           | 145.5                        | 140.2                        | (23)               |
| Myxophaga       | Asiocoleidae       | 272.5                         | 268                           | 236                          | 230                          | (23, 24)           |
| Myxophaga       | Hydroscaphidae     | 130                           | 125                           | 0 (extant)                   | 0 (extant)                   | (28)               |
| Myxophaga       | Lepiceridae        | 106                           | 100                           | 0 (extant)                   | 0 (extant)                   | (29, 30)           |
| Myxophaga       | Schizocoleidae     | 268                           | 265                           | 236                          | 201.5                        | (24, 31)           |
| Myxophaga       | Sphaeriusidae      | 106                           | 100                           | 0 (extant)                   | 0 (extant)                   | (32)               |
| Myxophaga       | Tricoleidae        | 236                           | 230                           | 236                          | 230                          | (33)               |
| Polyphaga       | Acanthocnemidae    | 112                           | 93.5                          | 0 (extant)                   | 0 (extant)                   | (5)                |
| Polyphaga       | Aderidae           | 106                           | 100                           | 0 (extant)                   | 0 (extant)                   | (32)               |
| Polyphaga       | Agyrtidae          | 171.6                         | 164.7                         | 0 (extant)                   | 0 (extant)                   | (34)               |
| Polyphaga       | Alloioscarabaeidae | 164.7                         | 155.7                         | 164.7                        | 155.7                        | (35)               |
| Polyphaga       | Anthicidae         | 125                           | 112                           | 0 (extant)                   | 0 (extant)                   | (26)               |
| Polyphaga       | Anthribidae        | 161.2                         | 155.7                         | 0 (extant)                   | 0 (extant)                   | (36)               |
| Polyphaga       | Artematopodidae    | 48.6                          | 40.4                          | 0 (extant)                   | 0 (extant)                   | (37)               |
| Polyphaga       | Attelabidae        | 203.6                         | 201.5                         | 0 (extant)                   | 0 (extant)                   | (10, 38)           |
| Polyphaga       | Belidae            | 125                           | 112                           | 0 (extant)                   | 0 (extant)                   | (39)               |

|           |                  |       |       |            |            |          |
|-----------|------------------|-------|-------|------------|------------|----------|
| Polyphaga | Berendtimiridae  | 48.6  | 40.4  | 48.6       | 40.4       | (40)     |
| Polyphaga | Biphyllidae      | 48.6  | 40.4  | 0 (extant) | 0 (extant) | (41)     |
| Polyphaga | Bostrichidae     | 34.01 | 33    | 0 (extant) | 0 (extant) | (42)     |
| Polyphaga | Bothrideridae    | 48.6  | 40.4  | 0 (extant) | 0 (extant) | (43)     |
| Polyphaga | Brachyceridae    | 70.6  | 65.5  | 0 (extant) | 0 (extant) | (44)     |
| Polyphaga | Brachypsectridae | 16    | 16    | 0 (extant) | 0 (extant) | (45)     |
| Polyphaga | Brentidae        | 93.5  | 89.3  | 0 (extant) | 0 (extant) | (46)     |
| Polyphaga | Buprestidae      | 236   | 230   | 0 (extant) | 0 (extant) | (47)     |
| Polyphaga | Byrrhidae        | 201.5 | 196.5 | 0 (extant) | 0 (extant) | (10, 48) |
| Polyphaga | Cantharidae      | 164.7 | 155.7 | 0 (extant) | 0 (extant) | (49)     |
| Polyphaga | Cerambycidae     | 150.8 | 145.5 | 0 (extant) | 0 (extant) | (12)     |
| Polyphaga | Cerophytidae     | 161.2 | 155.7 | 0 (extant) | 0 (extant) | (50)     |
| Polyphaga | Cerylonidae      | 145.5 | 140.2 | 0 (extant) | 0 (extant) | (10)     |
| Polyphaga | Chelonariidae    | 34.01 | 33    | 0 (extant) | 0 (extant) | (42)     |
| Polyphaga | Chrysomelidae    | 203.6 | 176   | 0 (extant) | 0 (extant) | (51)     |
| Polyphaga | Ciidae           | 106   | 100   | 0 (extant) | 0 (extant) | (32)     |
| Polyphaga | Clambidae        | 125   | 112   | 0 (extant) | 0 (extant) | (26)     |
| Polyphaga | Cleridae         | 130   | 125   | 0 (extant) | 0 (extant) | (52)     |
| Polyphaga | Coccinellidae    | 167.7 | 164.7 | 0 (extant) | 0 (extant) | (10)     |
| Polyphaga | Corylophidae     | 25.3  | 23.8  | 0 (extant) | 0 (extant) | (53)     |
| Polyphaga | Cryptophagidae   | 145.5 | 99.6  | 0 (extant) | 0 (extant) | (54)     |
| Polyphaga | Cucujidae        | 106   | 100   | 0 (extant) | 0 (extant) | (32)     |
| Polyphaga | Curculionidae    | 236   | 230   | 0 (extant) | 0 (extant) | (10)     |
| Polyphaga | Dascillidae      | 236   | 230   | 0 (extant) | 0 (extant) | (33)     |
| Polyphaga | Dermestidae      | 236   | 230   | 0 (extant) | 0 (extant) | (33)     |
| Polyphaga | Derodontidae     | 3.6   | 2.6   | 0 (extant) | 0 (extant) | (55)     |
| Polyphaga | Dryophthoridae   | 58.7  | 55.8  | 0 (extant) | 0 (extant) | (56)     |
| Polyphaga | Dryopidae        | 58.7  | 55.8  | 0 (extant) | 0 (extant) | (57)     |
| Polyphaga | Elateridae       | 236   | 201.5 | 0 (extant) | 0 (extant) | (58)     |
| Polyphaga | Elmidae          | 48.6  | 40.4  | 0 (extant) | 0 (extant) | (59)     |
| Polyphaga | Elodophthalmidae | 125   | 112   | 125        | 112        | (26)     |
| Polyphaga | Endomychidae     | 130   | 125   | 0 (extant) | 0 (extant) | (60)     |
| Polyphaga | Erotylidae       | 58.7  | 55.8  | 0 (extant) | 0 (extant) | (57)     |
| Polyphaga | Eucinetidae      | 145.5 | 140.2 | 0 (extant) | 0 (extant) | (61)     |
| Polyphaga | Eucnemidae       | 106   | 100   | 0 (extant) | 0 (extant) | (32)     |
| Polyphaga | Geotrupidae      | 150.8 | 145.5 | 0 (extant) | 0 (extant) | (62)     |
| Polyphaga | Glaphyridae      | 130   | 125   | 0 (extant) | 0 (extant) | (52)     |
| Polyphaga | Glaresidae       | 201.5 | 196.5 | 0 (extant) | 0 (extant) | (62)     |
| Polyphaga | Helotidae        | 24.2  | 13.5  | 0 (extant) | 0 (extant) | (63)     |
| Polyphaga | Heteroceridae    | 145.5 | 140.2 | 0 (extant) | 0 (extant) | (61)     |
| Polyphaga | Histeridae       | 106   | 100   | 0 (extant) | 0 (extant) | (64)     |
| Polyphaga | Hybosoridae      | 161.2 | 155.7 | 0 (extant) | 0 (extant) | (65)     |
| Polyphaga | Hydraenidae      | 183   | 175.6 | 0 (extant) | 0 (extant) | (15)     |

|           |                 |       |       |            |            |          |
|-----------|-----------------|-------|-------|------------|------------|----------|
| Polyphaga | Hydrophilidae   | 201.5 | 196.5 | 0 (extant) | 0 (extant) | (9, 10)  |
| Polyphaga | Kateretidae     | 125   | 112   | 0 (extant) | 0 (extant) | (26)     |
| Polyphaga | Laemophloeidae  | 48.6  | 40.4  | 0 (extant) | 0 (extant) | (66)     |
| Polyphaga | Lampyridae      | 48.6  | 40.4  | 0 (extant) | 0 (extant) | (67)     |
| Polyphaga | Latridiidae     | 201.5 | 196.5 | 0 (extant) | 0 (extant) | (48)     |
| Polyphaga | Leiodidae       | 236   | 230   | 0 (extant) | 0 (extant) | (33)     |
| Polyphaga | Limnichidae     | 48.6  | 40.4  | 0 (extant) | 0 (extant) | (68)     |
| Polyphaga | Lucanidae       | 161.2 | 155.7 | 0 (extant) | 0 (extant) | (69)     |
| Polyphaga | Lycidae         | 48.6  | 40.4  | 0 (extant) | 0 (extant) | (70)     |
| Polyphaga | Lymexylidae     | 125   | 112   | 0 (extant) | 0 (extant) | (71)     |
| Polyphaga | Megalopodidae   | 48.6  | 40.4  | 0 (extant) | 0 (extant) | (72)     |
| Polyphaga | Melandryidae    | 112   | 93.5  | 0 (extant) | 0 (extant) | (73)     |
| Polyphaga | Meloidae        | 58.7  | 55.8  | 0 (extant) | 0 (extant) | (74)     |
| Polyphaga | Melyridae       | 106   | 100   | 0 (extant) | 0 (extant) | (32)     |
| Polyphaga | Mesocinetidae   | 150.8 | 145.5 | 136.4      | 130        | (75, 76) |
| Polyphaga | Mordellidae     | 161.2 | 155.7 | 0 (extant) | 0 (extant) | (77)     |
| Polyphaga | Mycetophagidae  | 201.5 | 196.5 | 0 (extant) | 0 (extant) | (9)      |
| Polyphaga | Mycteridae      | 48.6  | 40.4  | 0 (extant) | 0 (extant) | (78)     |
| Polyphaga | Nemonychidae    | 161.2 | 155.7 | 0 (extant) | 0 (extant) | (5)      |
| Polyphaga | Nitidulidae     | 201.5 | 196.5 | 0 (extant) | 0 (extant) | (48)     |
| Polyphaga | Nosodendridae   | 48.6  | 40.4  | 0 (extant) | 0 (extant) | (66)     |
| Polyphaga | Ochodaeidae     | 164.7 | 155.7 | 0 (extant) | 0 (extant) | (79)     |
| Polyphaga | Oedemeridae     | 106   | 100   | 0 (extant) | 0 (extant) | (32)     |
| Polyphaga | Omethidae       | 48.6  | 40.4  | 0 (extant) | 0 (extant) | (67)     |
| Polyphaga | Parandrexidae   | 161.2 | 155.7 | 130        | 125        | (80, 81) |
| Polyphaga | Passalidae      | 125   | 112   | 0 (extant) | 0 (extant) | (82)     |
| Polyphaga | Phalacridae     | 33.9  | 28.4  | 0 (extant) | 0 (extant) | (83)     |
| Polyphaga | Pleocomidae     | 145.5 | 140.2 | 0 (extant) | 0 (extant) | (5)      |
| Polyphaga | Praelateriidae  | 201.5 | 196.5 | 201.5      | 196.5      | (84)     |
| Polyphaga | Prionoceridae   | 55.8  | 48.6  | 0 (extant) | 0 (extant) | (85)     |
| Polyphaga | Psephenidae     | 34.01 | 33    | 0 (extant) | 0 (extant) | (86)     |
| Polyphaga | Ptiliidae       | 106   | 100   | 0 (extant) | 0 (extant) | (32)     |
| Polyphaga | Ptilodactylidae | 48.6  | 40.4  | 0 (extant) | 0 (extant) | (87)     |
| Polyphaga | Ptinidae        | 203.6 | 201.5 | 0 (extant) | 0 (extant) | (88)     |
| Polyphaga | Pyrochroidae    | 125   | 112   | 0 (extant) | 0 (extant) | (89)     |
| Polyphaga | Pythidae        | 34.01 | 33    | 0 (extant) | 0 (extant) | (86)     |
| Polyphaga | Ripiphoridae    | 112   | 99.6  | 0 (extant) | 0 (extant) | (90)     |
| Polyphaga | Salpingidae     | 106   | 100   | 0 (extant) | 0 (extant) | (32)     |
| Polyphaga | Scarabaeidae    | 183   | 175.6 | 0 (extant) | 0 (extant) | (91)     |
| Polyphaga | Schizopodidae   | 48.6  | 40.4  | 0 (extant) | 0 (extant) | (92)     |
| Polyphaga | Scirtidae       | 145.5 | 140.2 | 0 (extant) | 0 (extant) | (12)     |
| Polyphaga | Scraptiidae     | 145.5 | 140.2 | 0 (extant) | 0 (extant) | (93)     |
| Polyphaga | Septiventeridae | 130   | 125   | 130        | 125        | (94)     |

|           |                   |       |       |            |            |               |
|-----------|-------------------|-------|-------|------------|------------|---------------|
| Polyphaga | Silphidae         | 230   | 203.6 | 0 (extant) | 0 (extant) | (95)          |
| Polyphaga | Silvanidae        | 106   | 100   | 0 (extant) | 0 (extant) | (96)          |
| Polyphaga | Sinisilvanidae    | 55.8  | 48.6  | 55.8       | 48.6       | (19)          |
| Polyphaga | Sphindidae        | 25.3  | 23.8  | 0 (extant) | 0 (extant) | (53)          |
| Polyphaga | Staphylinidae     | 171.6 | 167.7 | 0 (extant) | 0 (extant) | (15)          |
| Polyphaga | Synchroidae       | 34.01 | 33    | 0 (extant) | 0 (extant) | (97)          |
| Polyphaga | TenebFam1         | 164.7 | 155.7 | 164.7      | 155.7      | (98)          |
| Polyphaga | Tenebrionidae     | 236   | 230   | 0 (extant) | 0 (extant) | (33)          |
| Polyphaga | Tetratomidae      | 112   | 93.5  | 0 (extant) | 0 (extant) | (73)          |
| Polyphaga | Throscidae        | 201.5 | 196.5 | 0 (extant) | 0 (extant) | (48)          |
| Polyphaga | Trogidae          | 55.8  | 40.4  | 0 (extant) | 0 (extant) | (62)          |
| Polyphaga | Trogossitidae     | 183   | 175.6 | 0 (extant) | 0 (extant) | (10)          |
| Polyphaga | Ulyanidae         | 136.4 | 130   | 136.4      | 130        | (99)          |
| Polyphaga | Vesperidae        | 24.2  | 13.5  | 0 (extant) | 0 (extant) | (63)          |
| Polyphaga | Zopheridae        | 106   | 100   | 0 (extant) | 0 (extant) | (32)          |
| Stem      | Labradorocoleidae | 99.6  | 93.5  | 99.6       | 93.5       | (23)          |
| Stem      | Oborocoleidae     | 290   | 284   | 290        | 284        | (100)         |
| Stem      | Permocupedidae    | 284   | 279.5 | 265        | 260.5      | (101, 102)    |
| Stem      | Permosynidae      | 255   | 252.3 | 145.5      | 140.2      | (9, 103)      |
| Stem      | Rhombocoleidae    | 272.5 | 268   | 130        | 99.6       | (13, 24, 104) |
| Stem      | Sojanocoleidae    | 272.5 | 268   | 272.5      | 268        | (20)          |
| Stem      | Taldycupedidae    | 268   | 265   | 175.6      | 161.2      | (18, 23)      |
| Stem      | Triadocupedidae   | 236   | 230   | 230        | 203.6      | (105)         |
| Stem      | Tshekardocoleidae | 290   | 284   | 125        | 112        | (100, 106)    |

## REFERENCES

1. Alroy J (2008) Dynamics of origination and extinction in the marine fossil record. *Proceedings of the National Academy of Sciences of the United States of America* 105(Suppl. 1):11536-11542.
2. Alroy J, *et al.* (2008) Phanerozoic trends in the global diversity of marine invertebrates. *Science (Wash D C)* 321:97-100.
3. Alroy J (2010) Geographical, environmental and intrinsic biotic controls on Phanerozoic marine diversification. *Palaeontology (Oxford)* 53(6):1211-1235.
4. Foote M (2000) Origination and extinction components of taxonomic diversity: general problems. in *Paleobiology*, eds Erwin DH & Wing SL (The Paleontological Society, Lawrence, KS), pp 74-102.

5. Arnoldi LV, Zherikhin VV, Nikritin LM, & Ponomarenko AG (1992) *Mesozoic Coleoptera* (Smithsonian Institution Libraries and The National Science Foundation, Washington) p 285.
6. Ponomarenko AG (1993) Two new species of Mesozoic dytiscoid beetles from Asia. *Paleontological Journal* 27(1A):182-191.
7. Lin QB (1992) Late Triassic insect fauna from Toksun, Xinjiang. *Acta Palaeontologica Sinica* 31(3):334.
8. Ponomarenko AG & Kalugina HS (1980) General Characteristics of the Insects from the Manlay Locality. *Rannemelovoe ozero Manlai (Early Cretaceous Lake Manlay)*, ed Kalugina NS (Nauka, Moscow), pp 68-81.
9. Heer O (1852) Die Lias-Insel des Aargau's. *Zwei Geologische Vortrage Gehalten im Marz 1852* 1:1-15.
10. Handlirsch A (1906-1908) *Die fossilen Insekten und die Phylogenie der rezenten Formen. Erin Handbuch fur Palaontologen und Zoologen* (Wilhelm Engelmann, Leipzig) p 1430.
11. Ghosh SC, Pal TK, & Nandi A (2007) First record of an aquatic beetle larva (Insecta: Coleoptera) from the Parsora Formation (Permo-Triassic), India. *Palaeontology* 50:1335-1340.
12. Giebel CG (1856) Die insecten und spinnen der vorwelt mit steter Berucksichtigung der lebenden insecten und spinnen. *Die Fauna der Vorwelt* 2:1-511.
13. Ren D, Zhu H, & Lu Y (1995) New Discovery of Early Cretaceous Fossil Insects from Chifeng City, Inner Mongolia. *Acta Geoscientia Sinica* 1995(4):432-438.
14. von Heyden C & von Heyden L (1866) Kafer und Polypen aus der Braunkohle des Siebengebriges. *Palaeontographica* 15:131-156.
15. Rasnitsyn AP ed (1985) *Jurassic Insects of Siberia and Mongolia*. (Turdy Paleontological Institute, Akad. Nau SSSR, Moscow), Vol 213, p 200.
16. Ponomarenko AG (1987) New Mesozoic Water Beetles (Insecta, Coleoptera) From Asia. . *Paleontological Journal* 21(2):79-92.

17. Ponomarenko AG & Volvok AN (2013) *Ademosynoides asiaticus* Martynov, 1936, the earliest known member of an extant beetle family (Insecta, Coleoptera, Trachypachidae). *Paleontological Journal* 47:610-606.
18. Hong YC (1983) *Middle Jurassic Fossil Insects in North China* (China Geological Press, Beijing).
19. Hong Y (2002) *Amber insects of China*. (Beijing Science and Technology Press, Beijing) p 653.
20. Martynov AV (1932) Permian fossil insects from the Arkhangelsk district. Part II. Neuroptera, Megaloptera and Colopetera, with the description of two new beetles from Tikhie Gory. *Trudy Paleontologicheskogo Instituta* 2:63-96.
21. Ren D (1995) Insecta. *Faunae and stratigraphy of Jurassic-Cretaceous in Beijing and the adjacent areas*:47-121.
22. Zhang HC (1997) Early Cretaceous insects from the Dalazi Formation of the Zhixin basin, Jilin Province, China. *Palaeoworld* 7:75-103.
23. Ponomarenko AG (1969) Historical development of Coleoptera Archostemata. *Transactions of the Paleontological Institute of the USSR Academy of Sciences* 125:1-239.
24. Rohdendorf BB (1961) *Superorder Coleopteroidea* (USSR Academy of Sciences).
25. Hong Y (1998) A new early Cretaceous beetle family - Magnocoleidae fam. n. (Insecta: Coleoptera) in Hebei Province. *Geoscience* 12(1):40-48.
26. Kirejtshuk AG & Azar D (2008) New taxa of beetles (Insecta, Coleoptera) from Lebanese amber with evolutionary and systematic comments. *Alavesia* 2:15-46.
27. Zherikhin VV & Gratshev GV (1993) Obrieniidae, fam. nov., the oldest Mesozoic weevils (Coleoptera, Curculionoidea). *Paleontological Journal* 27(1A):50-68.
28. Cai C, Andrew EZS, & Diying H (2012) The First Skiff Beetle (Coleoptera: Myxophaga: Hydroscaphidae) from Early Cretaceous Jehol Biota. *Journal of Paleontology* 86(1):116-119.

29. Kirejtshuk AG & Poinar G (2006) Haplochelidae, a new family of Cretaceous beetles (Coleoptera, Myxophaga) from Burmese amber. *Proceedings of the Entomological Society of Washington* 108(1):155-164.
30. Ge S-Q, Friedrich F, & Beutel RG (2010) On the systematic position and taxonomic rank of the extinct myxophagan Haplochelus (Coleoptera). *Insect Systematics & Evolution* 41(4):329-338.
31. Lin QB & Mou CJ (1989) On insects from Upper Triassic Xiaoping Formation, Guangzhou, China. *Acta Palaeontologica Sinica* 28:598-603.
32. Rasnitsyn AP & Ross AJ (2000) A preliminary list of arthropod families present in the Burmese amber collection at The Natural History Museum, London. In The history, geology, age and fauna (mainly insects) of Burmese amber, Myanmar. *Bulletin of the Natural History Museum, Geology Series* 56(1):53-58.
33. Dunstan B (1923) Mesozoic insects of Queensland Part 1 - Introduction and Coleoptera. *Queensland Geological Survey Publication* 273:1-89.
34. Lin QB (1985) Insect fossils from the Hanshan Formation at Hanshan County, Anhui Province. *Acta Palaeontologica Sinica* 24(3):300-315.
35. Bai M, Ahrens D, Yang X-K, & Ren D (2012) New fossil evidence of the early diversification of scarabs: *Alloioscarabaeus cheni* (Coleoptera: Scarabaeoidea) from the Middle Jurassic of Inner Mongolia, China. *Insect Science* 19(2):159-171.
36. Legalov AA (2011) The first record of anthribid beetle from the Jurassic of Kazakhstan (Coleoptera: Anthrididae). *Paleontological Journal* 45(6):629-633.
37. Hornschemeyer T (1998) New species of *Electribius* Crowson 1973 (Coleoptera: Armatopodidae) from Balite amber. *Palaeontologische Zeitschrift* 72(3):299-305.
38. Heer O (1847) *Die Insektenfauna der Tertiargebilde von Oeningen und von Radoboj in Croatien*. (Erster theil: Kafer, Leipzig) pp 1-229.
39. Zherikhin VV & Gratshev GV (2004) Fossil Curculionoid Beetles (Coleoptera, Curculionoidea) from the Lower Cretaceous of Northwestern Brazil. *Paleontological Journal* 38(5):528-537.



40. Winkler JR (1987) Berendtimiridae fam. n, a new family of fossil beetles from Baltic Amber. *Mitteilungen der Munchner Entomologischen Gesellschaft* 77:51-59.
41. Vitali F (2010) *Diplocoelus probiphyllus* n.sp., the first known fossil False Skin Beetle (Coleoptera: Biphyllidae). *Annales de la Societe Entomologique de France* 46(1-2):168-172.
42. Wickham HF (1914) New Miocene Coleoptera from Florissant. *Bulletin of the Museum of Comparative Zoology, Harvard College* 53:423-494.
43. Scudder SH (1891) Fossil insects of the world, including Myriapods and arachnids. *Bulletin, United States Geological Survey* 71:1-744.
44. Kuschel G (1959) Un Cuculionido del Cretacoo Superior, primer insecto fosil de Chile. *Investigaciones Zoologicas Chilenas* 5:49-54.
45. Costa C, Vanin SA, Lawrence JF, Ide S, & Branham MA (2006) Review of the family Brachypsectridae (Coleoptera: Elateroidea). *Annals of the Entomological Society of America* 99:409-432.
46. Kuschel G, Oberprieler RG, & Rayner RJ (1994) Cretaceous weevils from southern Africa, with description of a new genus and species and phylogenetic and zoogeographical comments (Coleoptera: Curculionoidea). *Entomologica Scandinavia* 25:137-149.
47. Etheridge R & Olliff AS (1890) The Mesozoic and Tertiary insects of New South Wales. *Memoirs of the Geological Survey of New South Wales, Palaeontology* 7:1-12.
48. Heer O (1865) *Die Urwelt der Schweiz* (F. Schulthess) p 713.
49. Kirejtshuk AG, Chang HL, Ren D, & Shih CK (2010) Family Lasiosynidae n fam, new palaeoendemic Mesozoic family from the infraorder Elateriformia (Coleoptera: Polyphaga). *Annales de la Societe Entomologique de France* 46:67-87.
50. Dolin VG (1980) Click beetles (Coleoptera, Elateridae) from the Upper Jurassic of Karatau. *Fossil insects of the Mesozoic*, eds Dolin VG, Panfilov DV, Ponomarenko AG, & Pritykina DN (Naukova Dumka, Kiev), pp 17-81.

51. Brodie PB (1845) *A history of the fossil insects in the secondary rocks of England. Accompanied by a particular account of the strata in which they occur, and of the circumstances connected with their preservation.* (London).
52. Kolibac J & Huang D-Y (2011) *Mathesius liaoningensis* gen. et sp. nov. of Jehol Biota, a presumptive relative of the clerid or thaneroclerid branches of Cleroidea (Coleoptera). *Zootaxa* 2872:1-17.
53. Schumann H & Wendt H (1989) Zur Kenntnis der tierischen Inclusionen des Sächsischen Bernstein. *Dusch. entomol. Zeitschr* 36:33-44.
54. Cai C & Wang B (2013) The oldest silken fungus beetle from the Early Cretaceous of southern China (Coleoptera: Cryptophagidae: Atomariinae). *Alcheringa* 37:452-455.
55. Lin QB (1977) (Acad. Sinica, Nanking Institute Geol Paleontology, Science Press, Beijing) p 380.
56. Piton L (1935) Note sur un Coleoptere fossile du Lac Chambon (Puy-de-Dome). *Annales de la Societe Linneenne de Lyon* 78:177-178.
57. Piton L (1939) Note complementaire sur les insectes fossiles des cinerites pliocenes du lac chambon (Puy de Dome). *Revue de Sciences Naturelles d'Auvergne* 5:102-108.
58. Tillyard RJ (1916) Descriptions of the fossil insects; Mesozoic and Tertiary Insects of Queensland and New South Wales. Descriptions of the fossil insects and stratigraphical features. *Queensland Geological Survey* 253:11-70.
59. Bollow H (1940) Die erste Helminide (Col. Dryop.) aus Bernstein. *Mitteilungen der Munchner Entomologischen Gesellschaft* 30:117-119.
60. Zhang JF (1992) Fossil Coleoptera from Laiyang, Shandong Province. *Acta Entomologica Sinica* 35:331-338.
61. Ponomarenko AG (1986) Beetles. Scarabaeida (=Coleoptera), in Nasekomye v rannemelovykh ekosistemakh zapadnoy Mongolii. *The Joint Soviet-Mongolian Palaeontological Expedition*, ed Rasnitsyn AP), Vol 28, pp 84-105.

62. Krell FT (2000) The fossil record of Mesozoic and Tertiary Scarabaeoidea (Coleoptera: Polyphaga). *Invertebrate Taxonomy* 14(6):871-905.
63. Zhang JF, Sun B, & Zhang X (1994) *Miocene insects and spiders from Shanwang, Shandong* (Beijing Science Press, Beijing) pp 1-298.
64. Poinar G & Brown AE (2009) *Pantostictus burmanicus*, A new genus and species of Cretaceous Beetle (Coleoptera: Hydrophiloidea: Histeridae) in Burmese Amber. *Proceedings of the Entomological Society of Washington* 111(1):38-46.
65. Nikolajev GV (2010) On the Mesozoic taxa of scarabaeoid beetles of the family Hybosoridae (Coleoptera: Scarabaeoidea). *Paleontological Journal* 44(6):649-653.
66. Scudder SH (1890) The Tertiary insects of North America. *Report of the United States Geological Survey of the Territories* XIII:1-734.
67. Kazantsev SV (2012) New omethid and lampyrid taxa from the Baltic Amber (Insecta: Coleoptera). *Zootaxa* 3186:59-63.
68. Putz A, Hernando C, & Ribiera I (2004) A new genus of Limnichidae (Coleoptera) from Baltic amber. *Insect Systematics & Evolution* 35:329-334.
69. Nikolajev GV (1990) Lucanidae (Coleoptera) from the Palaeogene of Eurasia. *Paleontological Journal* 1990(4):119-122.
70. Kleine R (1940) Eine Lycidae aus dem Baltischen Bernstein. *Entomologische Blätter* 36(6):179-180.
71. Wolf-Schwenninger K (2011) The oldest fossil record of Lymexylidae (Insecta: Coleoptera) from the Lower Cretaceous Crato Formation of Brazil. *Insect Systematics & Evolution* 42:205-212.
72. Hieke F & Pietrzeniuk E (1984) Die Bernstein-Käfer des Museums für Naturkunde, Berlin (Insecta, Coleoptera). *Mitteilungen aus dem Zoologischen Museum in Berlin* 60:297-326.
73. Nikitskiy NB (1977) Two new genera of the Melandryidae (Coleoptera) from the Upper Cretaceous. *Paleontological Journal* 11(2):267-270.

74. Piton L (1940) Paleontologie du Gisement Eocene de Menat (Puy-de-Dome). *Memoires d la Societe d'histoire naturelle de Auvergne* 1.
75. Ponomarenko AG (1990) Beetles, Scarabaeida, . in *Pozdne-Mezozoyskie Nasekomye Vostochnogo Zabaykal'ya* (Akademiya Nauk SSSR, Trudy Paleontologicheskogo Instituta Moscow), pp 39-82.
76. Kirejtshuk AG & Ponomarenko AG (2010) A new coleopterous family Mesocinetidae fam. nov. (Coleoptera:Scirtoidea) from Late Mesozoic and notes on fossil remains from Shar-Teg (Upper Jurassic, South-Western Mongolia). *Zoosystematica Rossica* 19:301-325.
77. Scegoleva-Barovkaja TI (1929) Earliest representative of the Family Mordellidae (Coleoptera) from Jurassic sediments of Turkestan. *Doklady Akademiya Nauk SSSR* 1929(A):27-29.
78. Abdullah M (1964) New Heteromorous Beetles (Coleoptera) from the Baltic Amber of Eastern Prussia and Gum Copal of Zanzibar. *Transactions of the Royal Entomological Society of London* 116(13):329-346.
79. Nikolajev GV & Ren D (2010) The oldest fossil Ochodaeidae (Coleoptera: Scarabaeoidea) from the Middle Jurassic of China. *Zootaxa* 2553:65-68.
80. Martynov AV (1926) To the knowledge of fossil insects from Jurassic beds in Turkestan 5. On some interesting Coleoptera. *Ezhegodnik Russkogo Paleontologicheskogo Obshestva* 5(1):1-39.
81. Soriano C, Kirejtshuk AG, & Declos X (2006) The Mesozoic Laurasian family Parandrexidae (Insecta: Coleoptera), new species from the lower Cretaceous of Spain. *Comptes Rendus Palevol* 5(6):779-784.
82. Bechly G (1998) Santana - Schatzkammer fossiler Insekten. *Fossilien* 2 and 3(55-99 and 148-156).
83. Forster B (1891) Die insekten der "Plattigen Steinmerfels" von Brunstatt. *Abhandlungen zur Geologischen Specialkarte von Elsass-Lothringen, Band 3* 1:335-593.

84. Dolin VG (1973) Fossil forms of click-beetles (Elateridae, Coleoptera) from the Lower Jurassic of central Asia. *Fauna and biology of Moldavian insects.*, ed Yaroshenko Mea (Institut Zoologii, Akademiya Nauk Moldavskoy SSR, Kishinev), p 188.
85. Lawrence JF, Archibald SB, & Slipinski A (2008) A new species of Prionoceridae (Coleoptera: Cleroidea) from the Eocene of British Columbia, Canada. *Annales Zoologici* 58(4):689-693.
86. Wickham HF (1913) Fossil Coleoptera from the Wilson Ranch Near Florissant, Colorado. *Bulletin of the Laboratory of Natural History of the State University of Iowa* 6(4):329.
87. Motschulsky V (1856) Lettres de M. de Motschulsky a M. Menetries. *Etudes Entomologique* 5:3-38.
88. Linck O (1949) Fossile Bohrgänge (Anobichnium simile n.g. n.sp.) an einem Keuperholz. *Neues Jahrbuch Mineralogie, Geologie und Palaeontologie, Monatshefte* 1949B:180-185.
89. Vulcano MA & Pereira FS (1987) Entomofauna fossil da Chapada do Araripe, Ceara, Brasil - *Cretacimelittomoides cearensis* gen. no., sp. nov. (Coleoptera: Pyrochroidae). *Resumos da Comunicaoes* 27.
90. Perrichot V, Nel A, & Neraudeau D (2004) Two new wedge-shaped beetles in Albo-Cenomanian ambers of France (Coleoptera: Ripiphoridae: Ripiphorinae). *European Journal of Entomology* 101:577-581.
91. Bode A (1953) Die Insektenfauna des ostniedersächsischen oberen Lias. *Palaeontographica, Abteilung A* 103(1-4):1-375.
92. Iablokov-Khnzorian SM (1962) Representatives of Sternoxia (Coleoptera) in Baltic amber. *Paleontologicheskii Zhurnal* 3:81-89.
93. Medvedev LN (1969) New Mesozoic Coleoptera (Cucjoidea) of Asia. *Paleontological Journal* 3(1):108-113.
94. Bai M, Beutel RG, Shih CK, Ren D, & Yang X-K (2013) Septiventeridae, a new and ancestral fossil family of Scarabaeoidea (Insecta: Coleoptera) from the Late Jurassic to Early Cretaceous Yixian Formation. *Journal of Systematic Palaeontology* 11:359-374.

95. Zeuner FE (1960) A Triassic insect fauna from the Molteno beds of South Africa. *XI Internationaler Kongress fur Entomologie, Verhandlungen* 1:304-306.
96. Poinar G, Kirejtshuk AG, & Buckley R (2008) *Pleuroceratos burmiticus*, n. gen., n. sp. (Coleoptera: Silvanidae) from Early Cretaceous Burmese Amber. *Proceedings of the Entomological Society of Washington* 110(1):250-257.
97. Wickham HF (1911) Fossil Coleoptera from Florissant, with descriptions of several new species. *Bulletin of the American Museum of Natural History* 30:53-69.
98. Wang B & Zhang HC (2011) The oldest Tenebrionoidea (Coleoptera) from the middle Jurassic of China. *Journal of Paleontology* 85(2):260-270.
99. Gratshev GV (1999) Ulyanidae, an extinct family of weevils (Coleoptera, Curculionidae). *Proceedings of the First International Palaeoentomological Conference*:41-47.
100. Kukalova J (1969) On the systematic position of the supposed Permian beetles Tshekardocoleidae with a description of a new collection from Moravia. *Sborn. Geolog. Ved (P)* 11:139-162.
101. Ponomarenko AG (2004) Beetles (Insecta, Coleoptera) of the Late Permian and Early Triassic. *Paleontological Journal* 38(Suppl 2):S185-S196.
102. Pinto ID (1987) Permian insects from Parana Basin, South Brazil IV Coleoptera. *Pesquisas* 19:5-12.
103. Ponomarenko AG (2011) Systematic Palaeontology, in First beetle elytra, abdomen (Coleoptera) and a mine trace from LUNZ (Carnian, Late Triassic, Lunz-am-See, Austria) and their taphonomic and evolutionary aspects. *Palaeontology* 54(1):97-110.
104. Hong YC (1988) New fossil insects of Leshuiwu Formation, northeastern Jiangxi. *Professional Papers of Stratigraphy and Palaeontology* 21:172-179.
105. Ponomarenko AG (1966) New beetles of the family Cupedidae of the Upper Triassic. *Paleontological Journal* 1966(4):47-68.
106. Hong YC (1982) *Mesozoic Fossil Insects of Jiuquan Basin in Gansu Province* (China Geological Press, Beijing) pp 1-187.
